# Supplementary material
Source: PubMed Central journal article supplement (PMC2614069)
Supplement: 2008.160051_1.pdf [file 2008.160051_1.pdf]

Supplemental Fig. 1

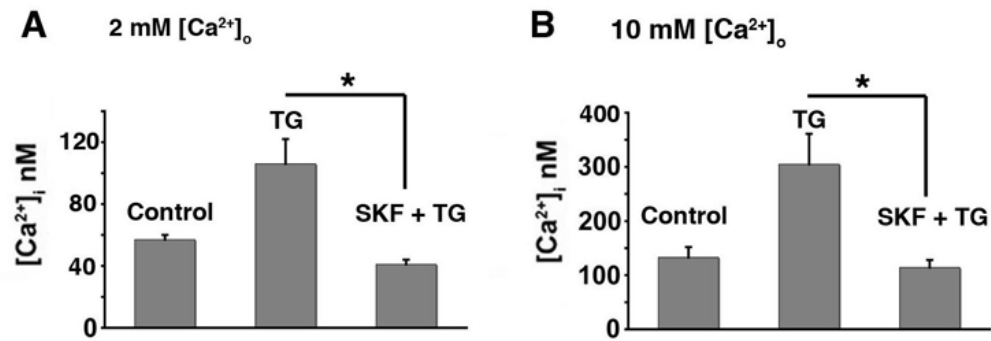

Thapsigargin-induced elevation of baseline  $[Ca^{2+}]_i$  is blocked by SKF 96365. (A) Rod IS baseline  $[Ca^{2+}]_i$  in 2 mM  $[Ca^{2+}]_o$  is elevated following superfusion with 1  $\mu$ M thapsigargin. The elevation is blocked by co-application of 5  $\mu$ M SKF 96365 (n=4,  $P < 0.05$ ) (B) Same experiment in the presence of 10 mM  $[Ca^{2+}]_o$  (n=4,  $P < 0.05$ ).
