# Supplementary material
Source: PubMed Central journal article supplement (PMC2614069)
Supplement: tjp0586-4859-SD1.pdf [file tjp0586-4859-SD1.pdf]

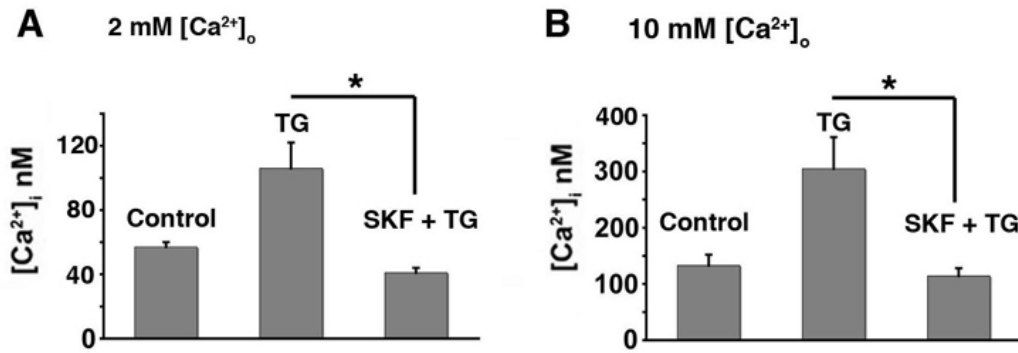

**Supplemental Fig. 1**

Thapsigargin-induced elevation of baseline  $[Ca^{2+}]_i$  is blocked by SKF 96365. (A) Rod IS baseline  $[Ca^{2+}]_i$  in 2 mM  $[Ca^{2+}]_o$  is elevated following superfusion with 1  $\mu$ M thapsigargin. The elevation is blocked by co-application of 5  $\mu$ M SKF 96365 ( $n=4$ ,  $P<0.05$ ) (B) Same experiment in the presence of 10 mM  $[Ca^{2+}]_o$  ( $n=4$ ,  $P<0.05$ ).
